# Supplementary material for: Automated Retinal Image Analysis for Evaluation of Focal Hyperpigmentary Changes in Intermediate Age-Related Macular Degeneration
Source: PubMed Central journal article supplement — Transl Vis Sci Technol. 2016 Mar 4;5(2):3. doi: 10.1167/tvst.5.2.3 (PMC4782823; doi:10.1167/tvst.5.2.3), 2016-03-04
Supplement: i2164-2591-5-2-3-s01.pdf [file i2164-2591-5-2-3-s01.pdf]

1 **Supplemental Digital Content**

2 **Supplemental Figure 1**

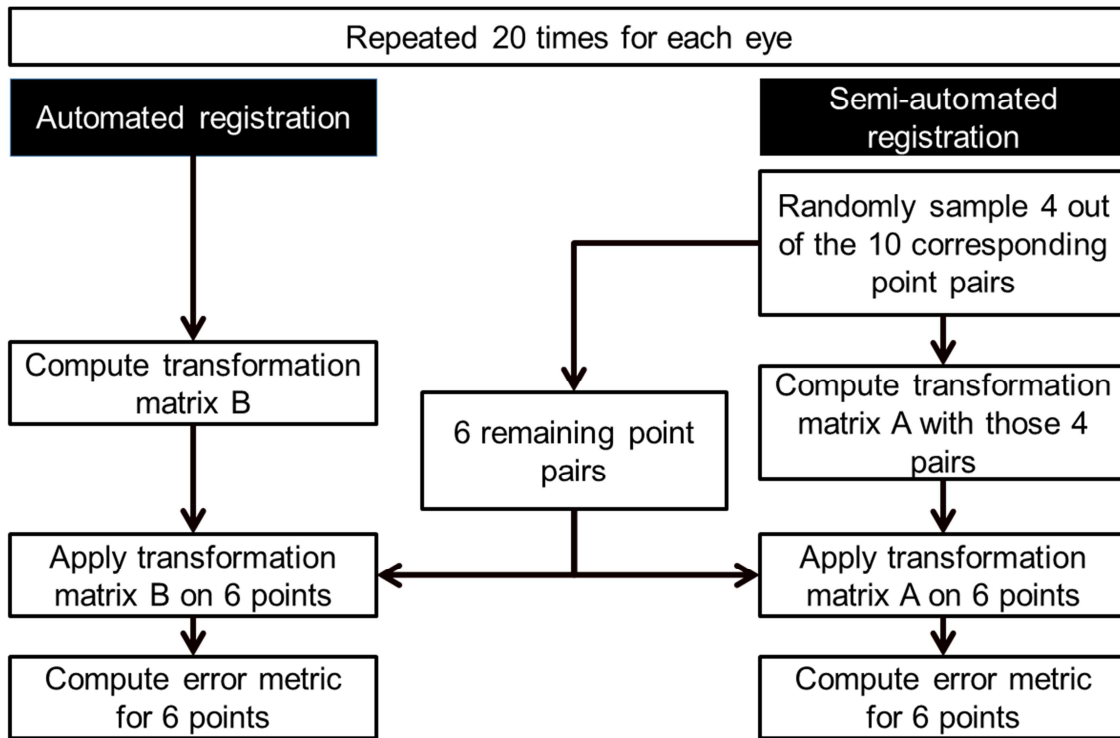

3

4 Evaluation strategy to compare the performance between automated and semi-automated

5 registration.

6 **Supplemental Figure 2**

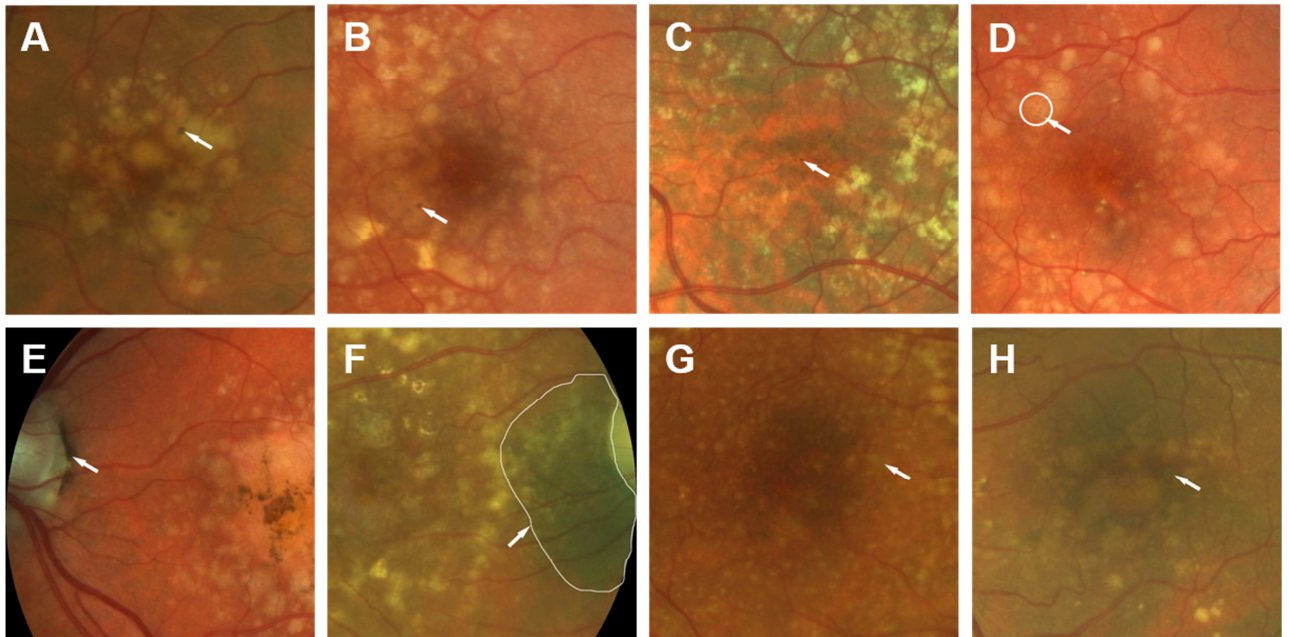

9 Representative examples of different categories of focal hyperpigmentary changes (FHC). A.  
10 Relevant (distinct), B. Relevant (subtle), C. Irrelevant (small), D. Irrelevant (small area), E.  
11 Pigment abnormalities adjacent to disc, F. Area with no hyperpigmentary changes, G.  
12 Questionable FHC, H. Not gradable
